# Supplementary material for: Structure–property relationships in critically connected (GeTe4)100−x(As2Se3)x glasses
Source: Royal Society of Chemistry journal article supplement (doi:10.1039/d2dt01969h), 2022-01-01
Supplement: d2dt01969h1.pdf [file d2dt01969h1.pdf]

## Supplementary Content

### Structure-property relations in a critically connected $(As_2Se_3)_x(GeTe_4)_{1-x}$ glasses

Shweta Chahal, Akila G. Prabhudessai, Roopali Shekhawat, S. Vinoth, K. Ramesh\*

Department of Physics, Indian Institute of Science, Bangalore 560012, India.

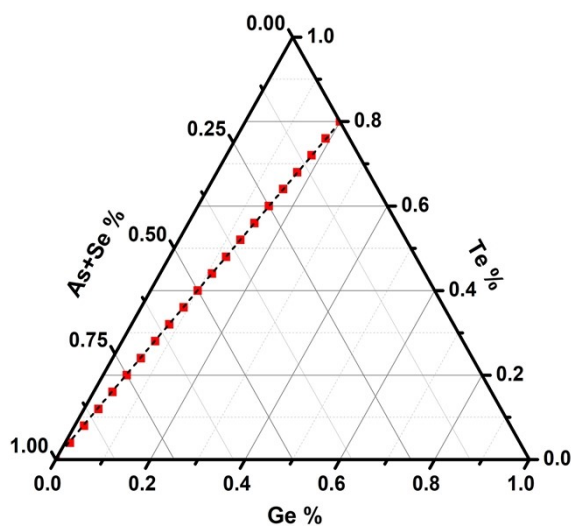

Fig. S1. Ternary diagram of  $GeTe_4$  substituted by  $As_2Se_3$

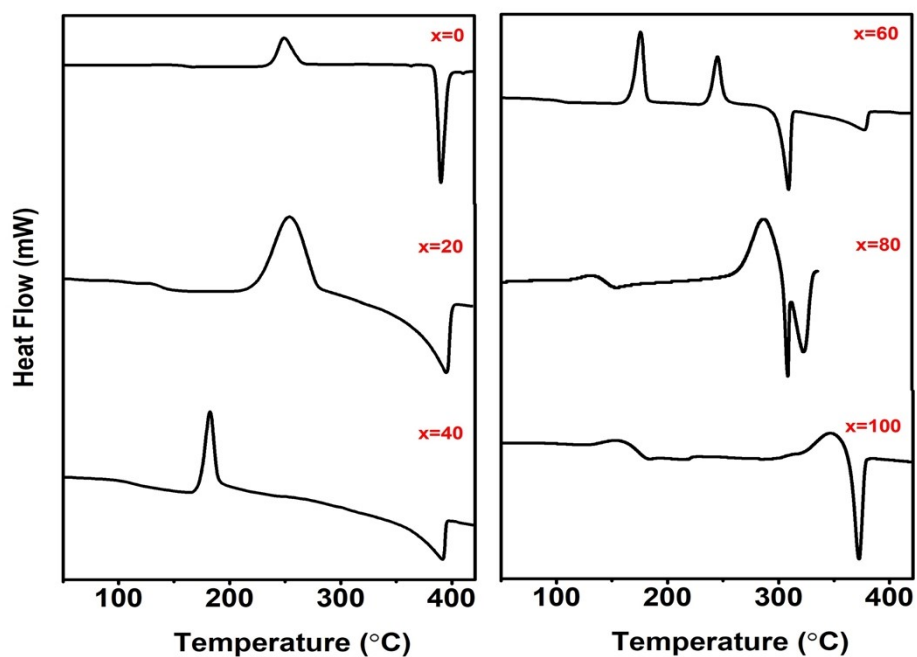

Fig.S2. DSC thermogram of  $(As_2Se_3)_x(GeTe_4)_{100-x}$  glasses

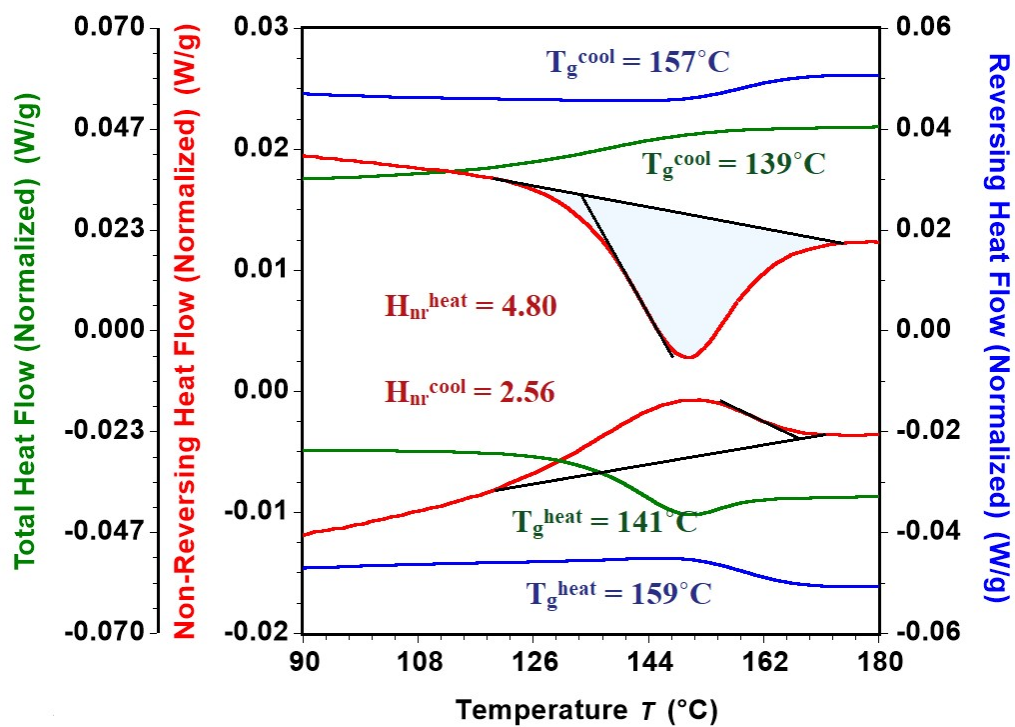

Fig.S3. Thermogram taken from MDSC showing Total heat flow, Non-Reversing heat flow and Reversing heat flow

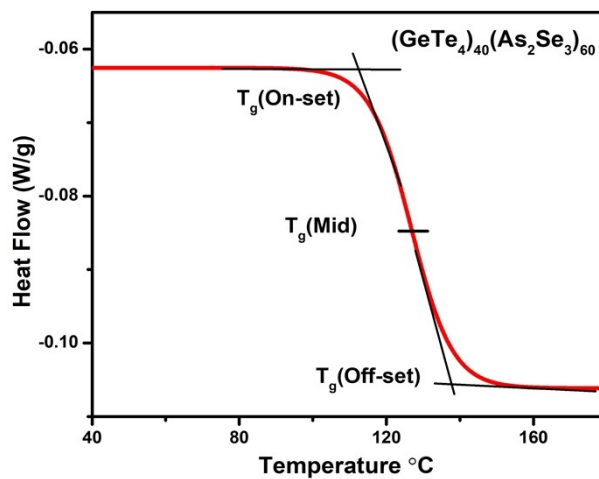

Fig.S4. DSC scan of  $(\text{GeTe}_4)_{40}(\text{As}_2\text{Se}_3)_{60}$  glass showing on-set, mid and off-set of glass transition at a heating rate of  $10^\circ\text{C}/\text{min}$

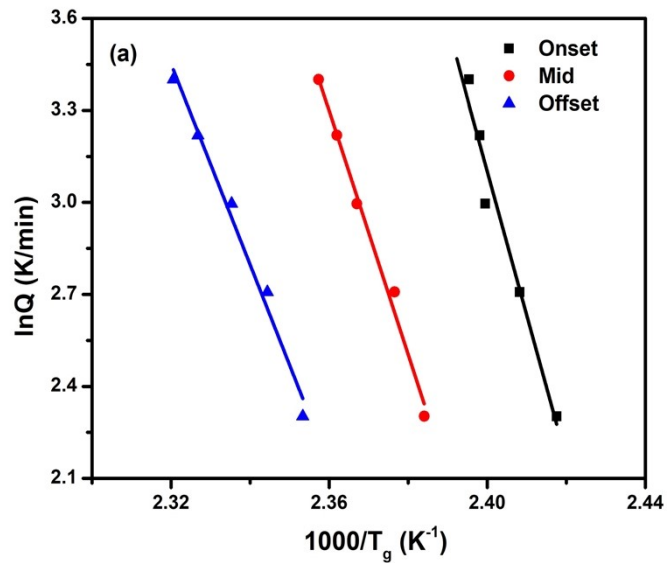

Fig.S5. Linear fit of  $\ln Q$  Vs  $1000/T_g$  of Ge<sub>20</sub>Te<sub>80</sub>

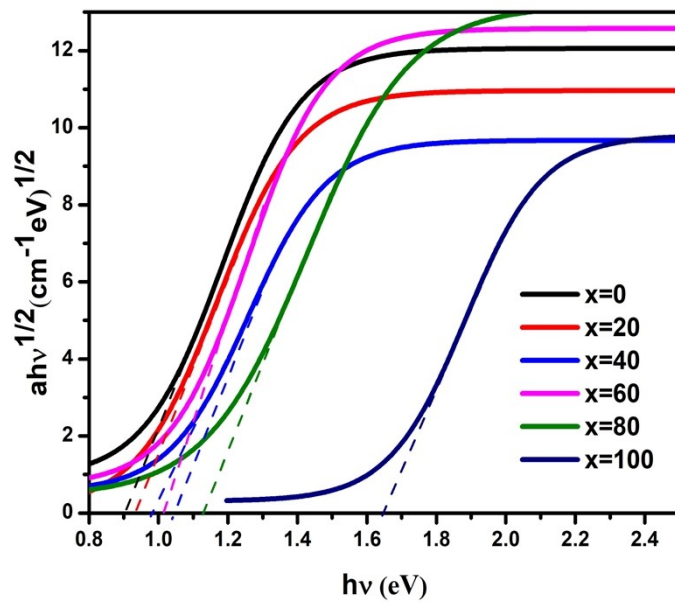

Fig.S6. Optical indirect bandgap of (As<sub>2</sub>Se<sub>3</sub>)<sub>x</sub>GeTe<sub>4</sub>(100-x) (0 ≤ x ≤ 100)
